# Supplementary material
Source: PubMed Central journal article supplement (PMC5856641)

**Figure 1**

**A Kinase domain-focused CRISPR screen**

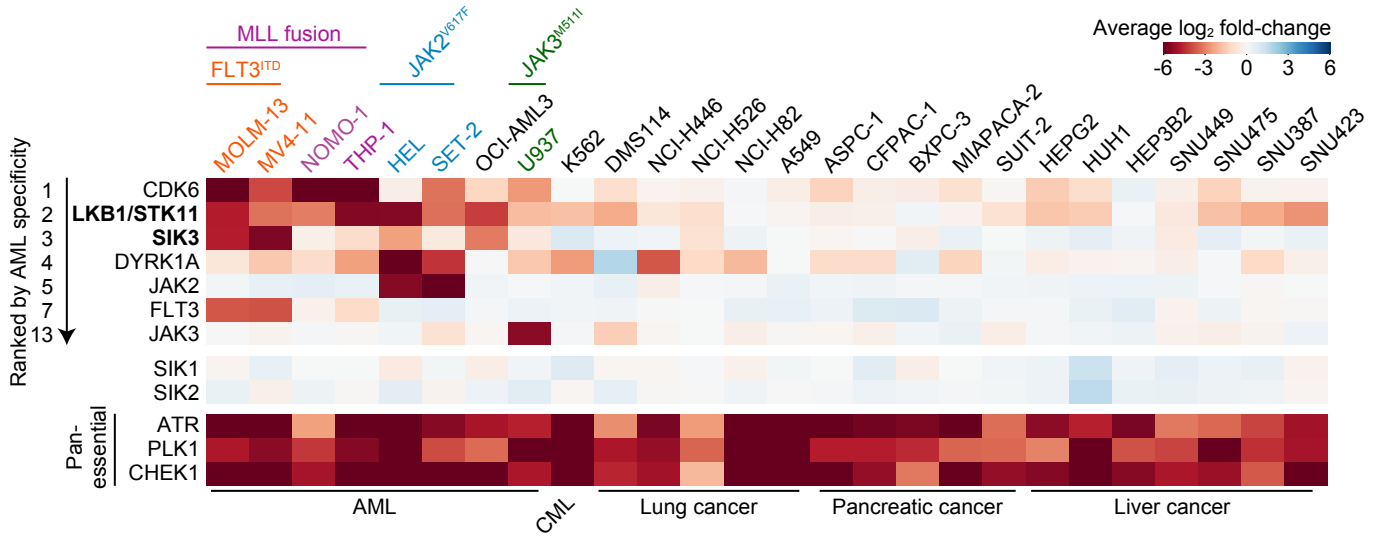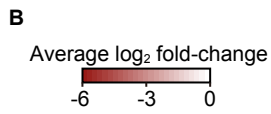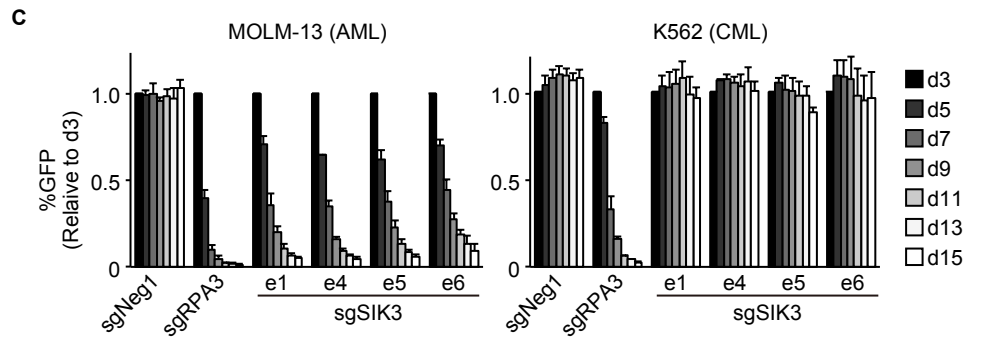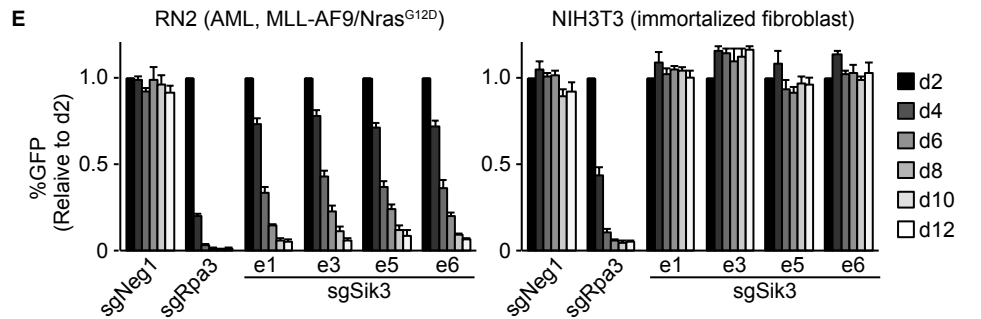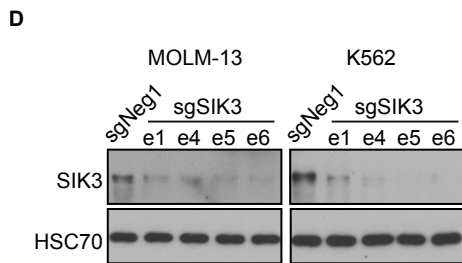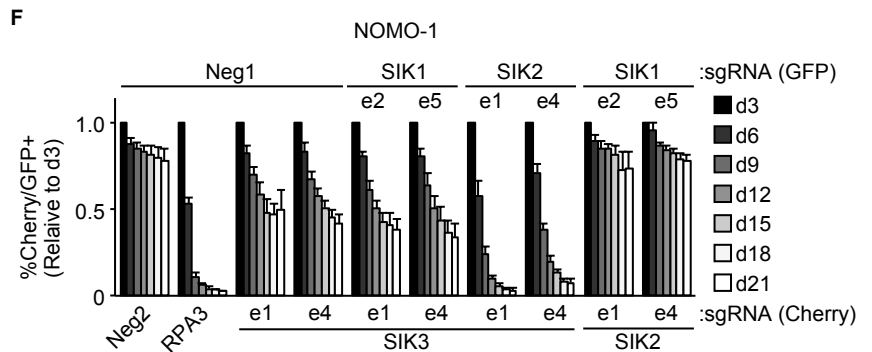

Supplement: NIHMS941608-supplement-1.pdf [file NIHMS941608-supplement-1.pdf]

**Figure 2**

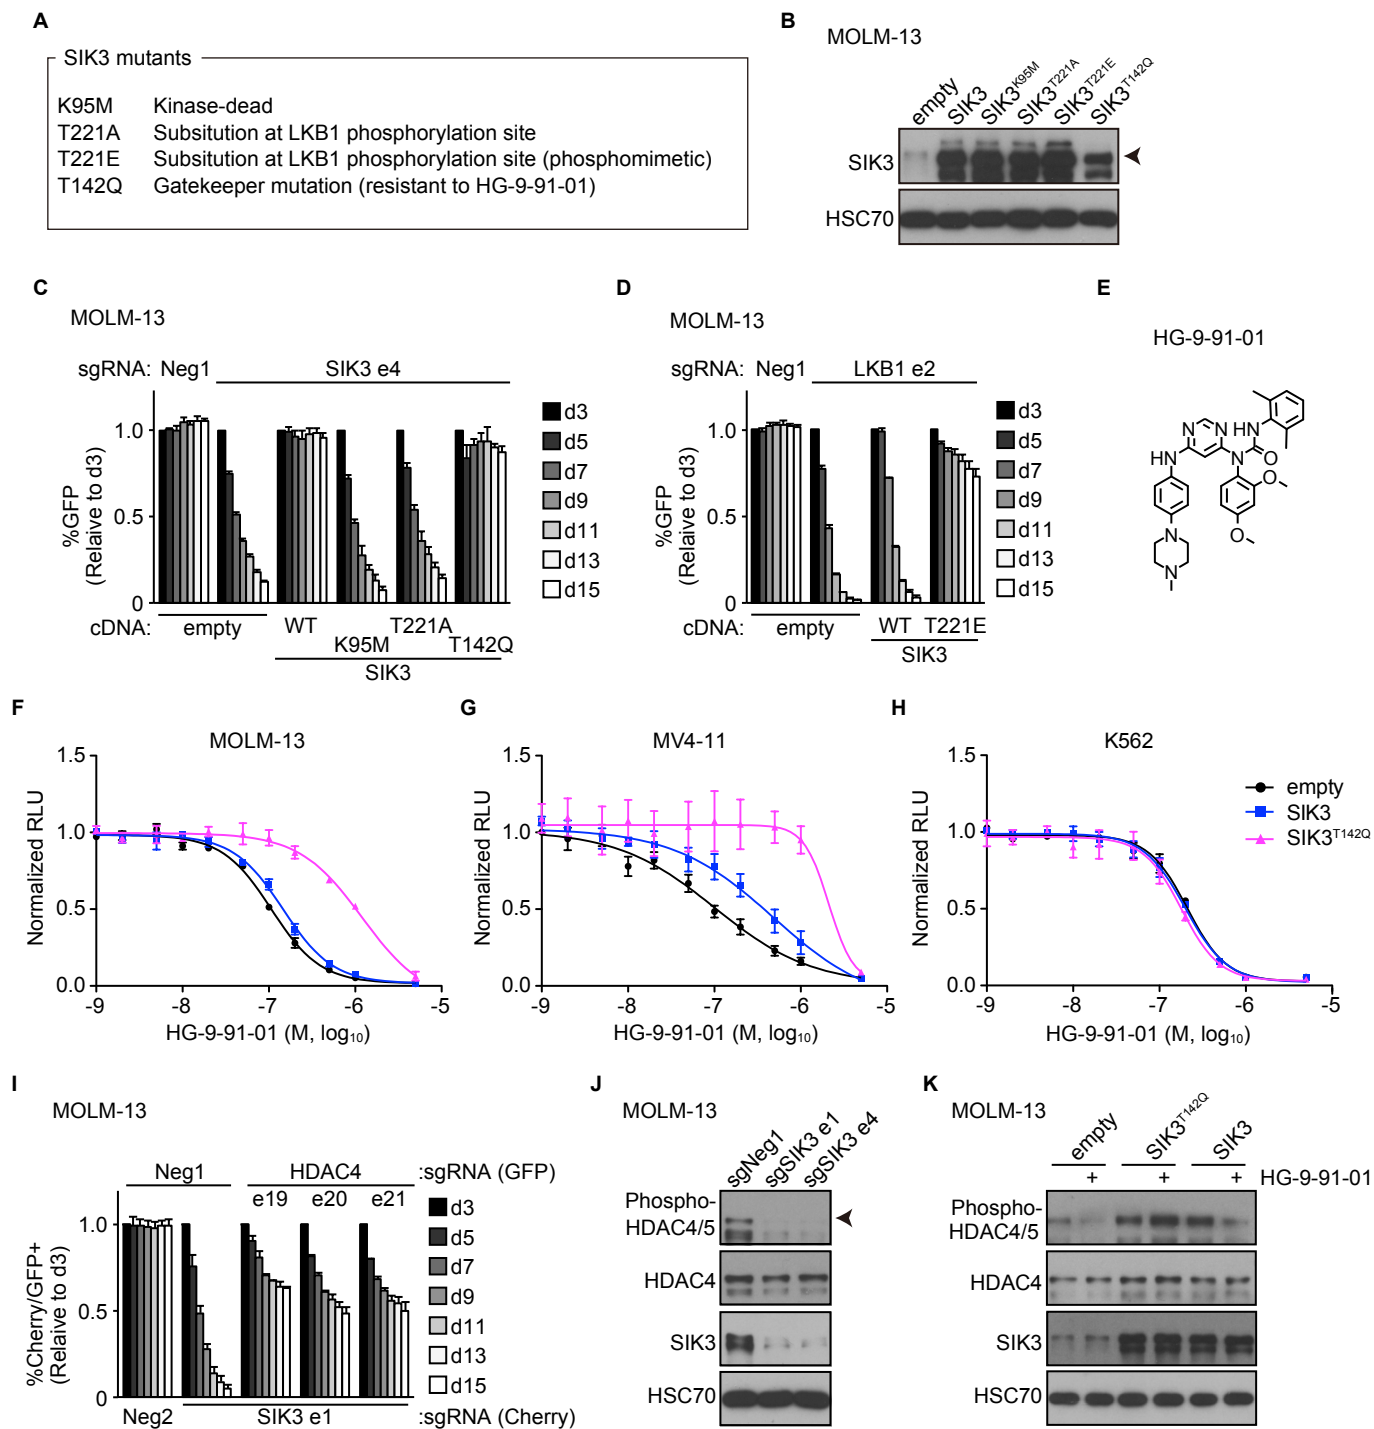

Supplement: NIHMS941608-supplement-2.pdf [file NIHMS941608-supplement-2.pdf]

**Figure 3**

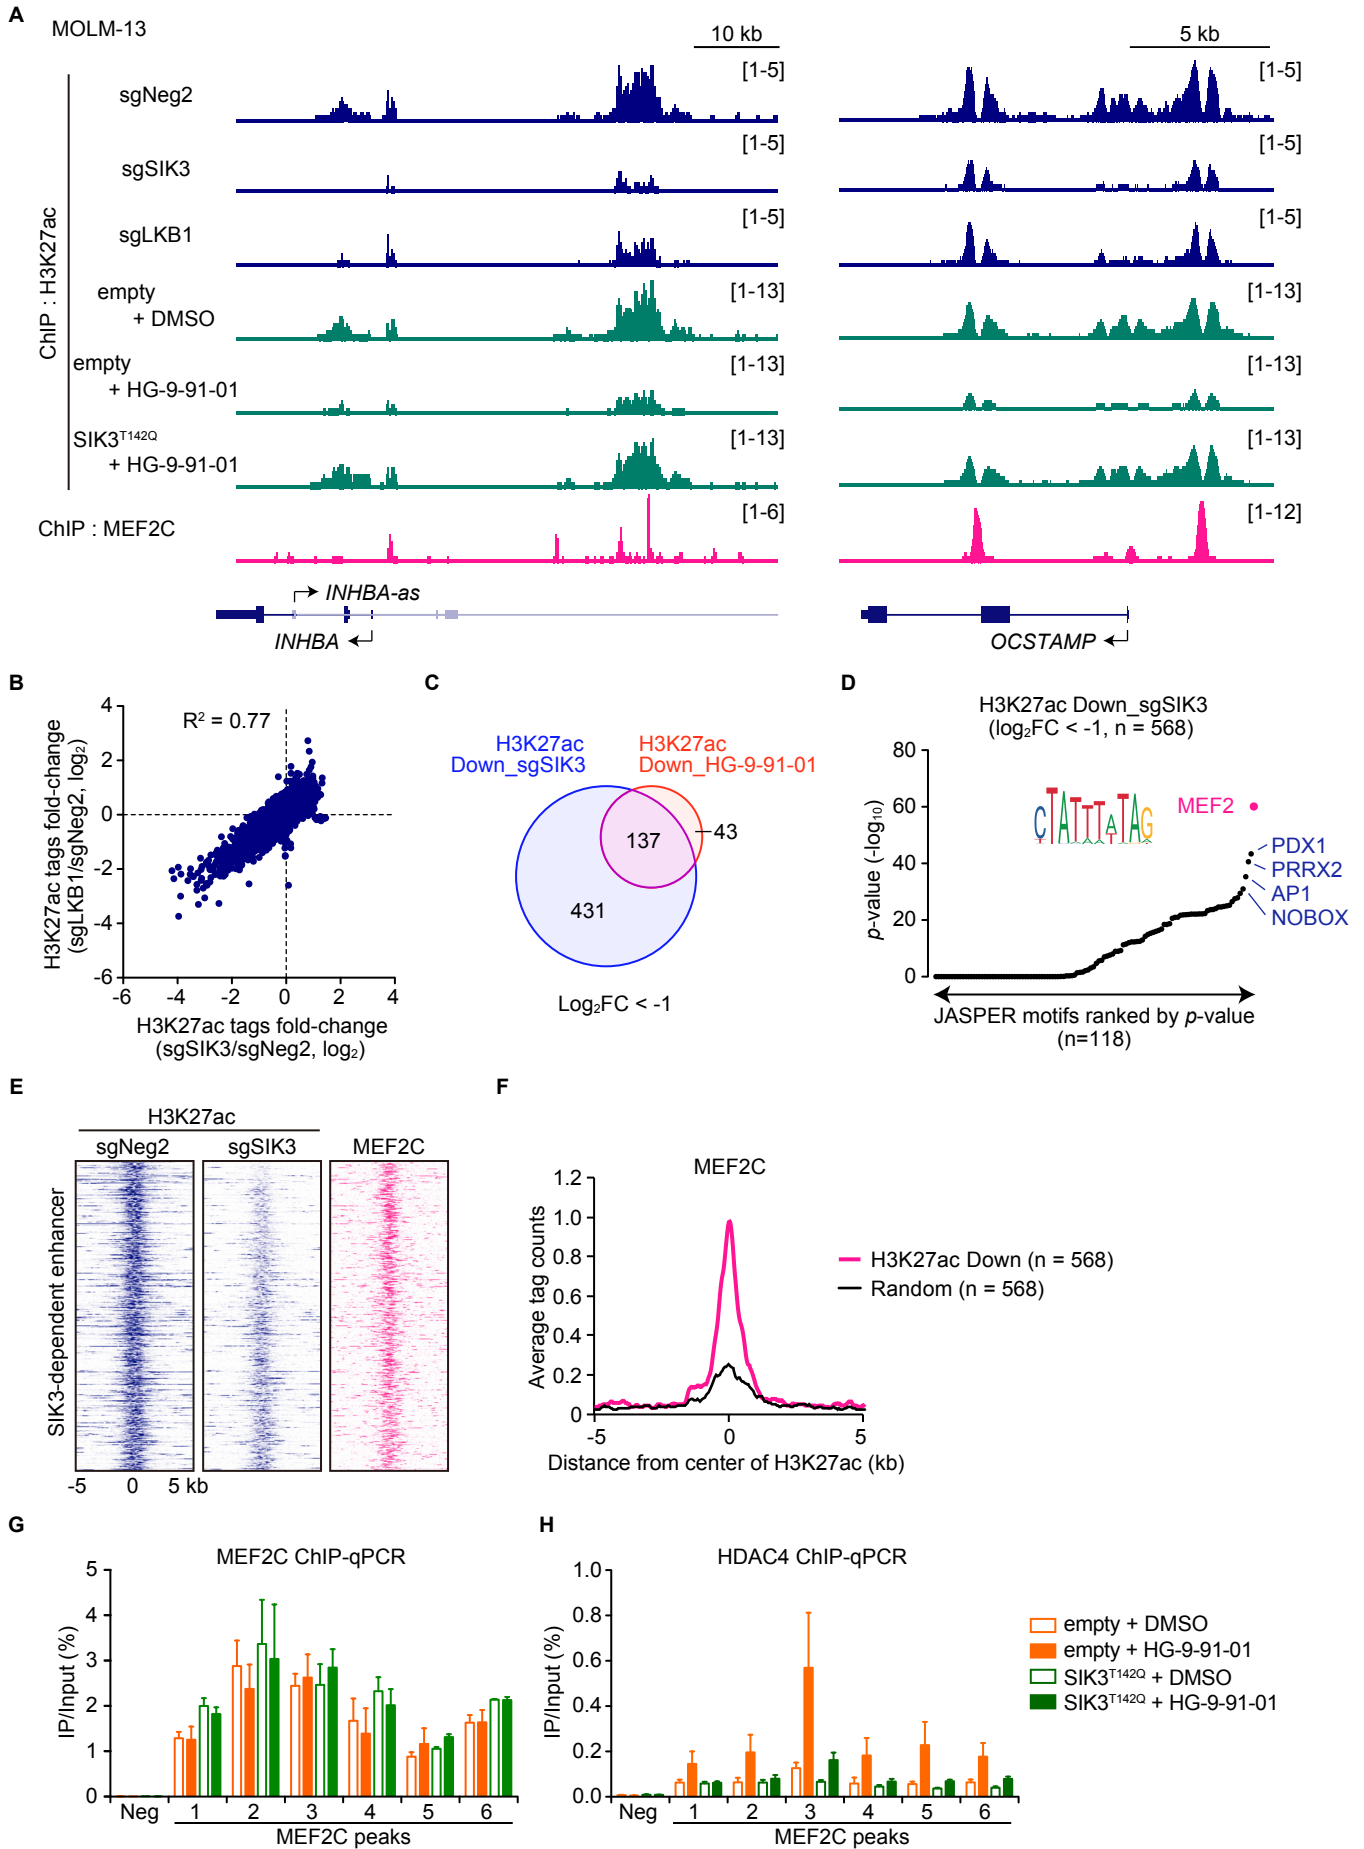

Supplement: NIHMS941608-supplement-3.pdf [file NIHMS941608-supplement-3.pdf]

**Figure 4**

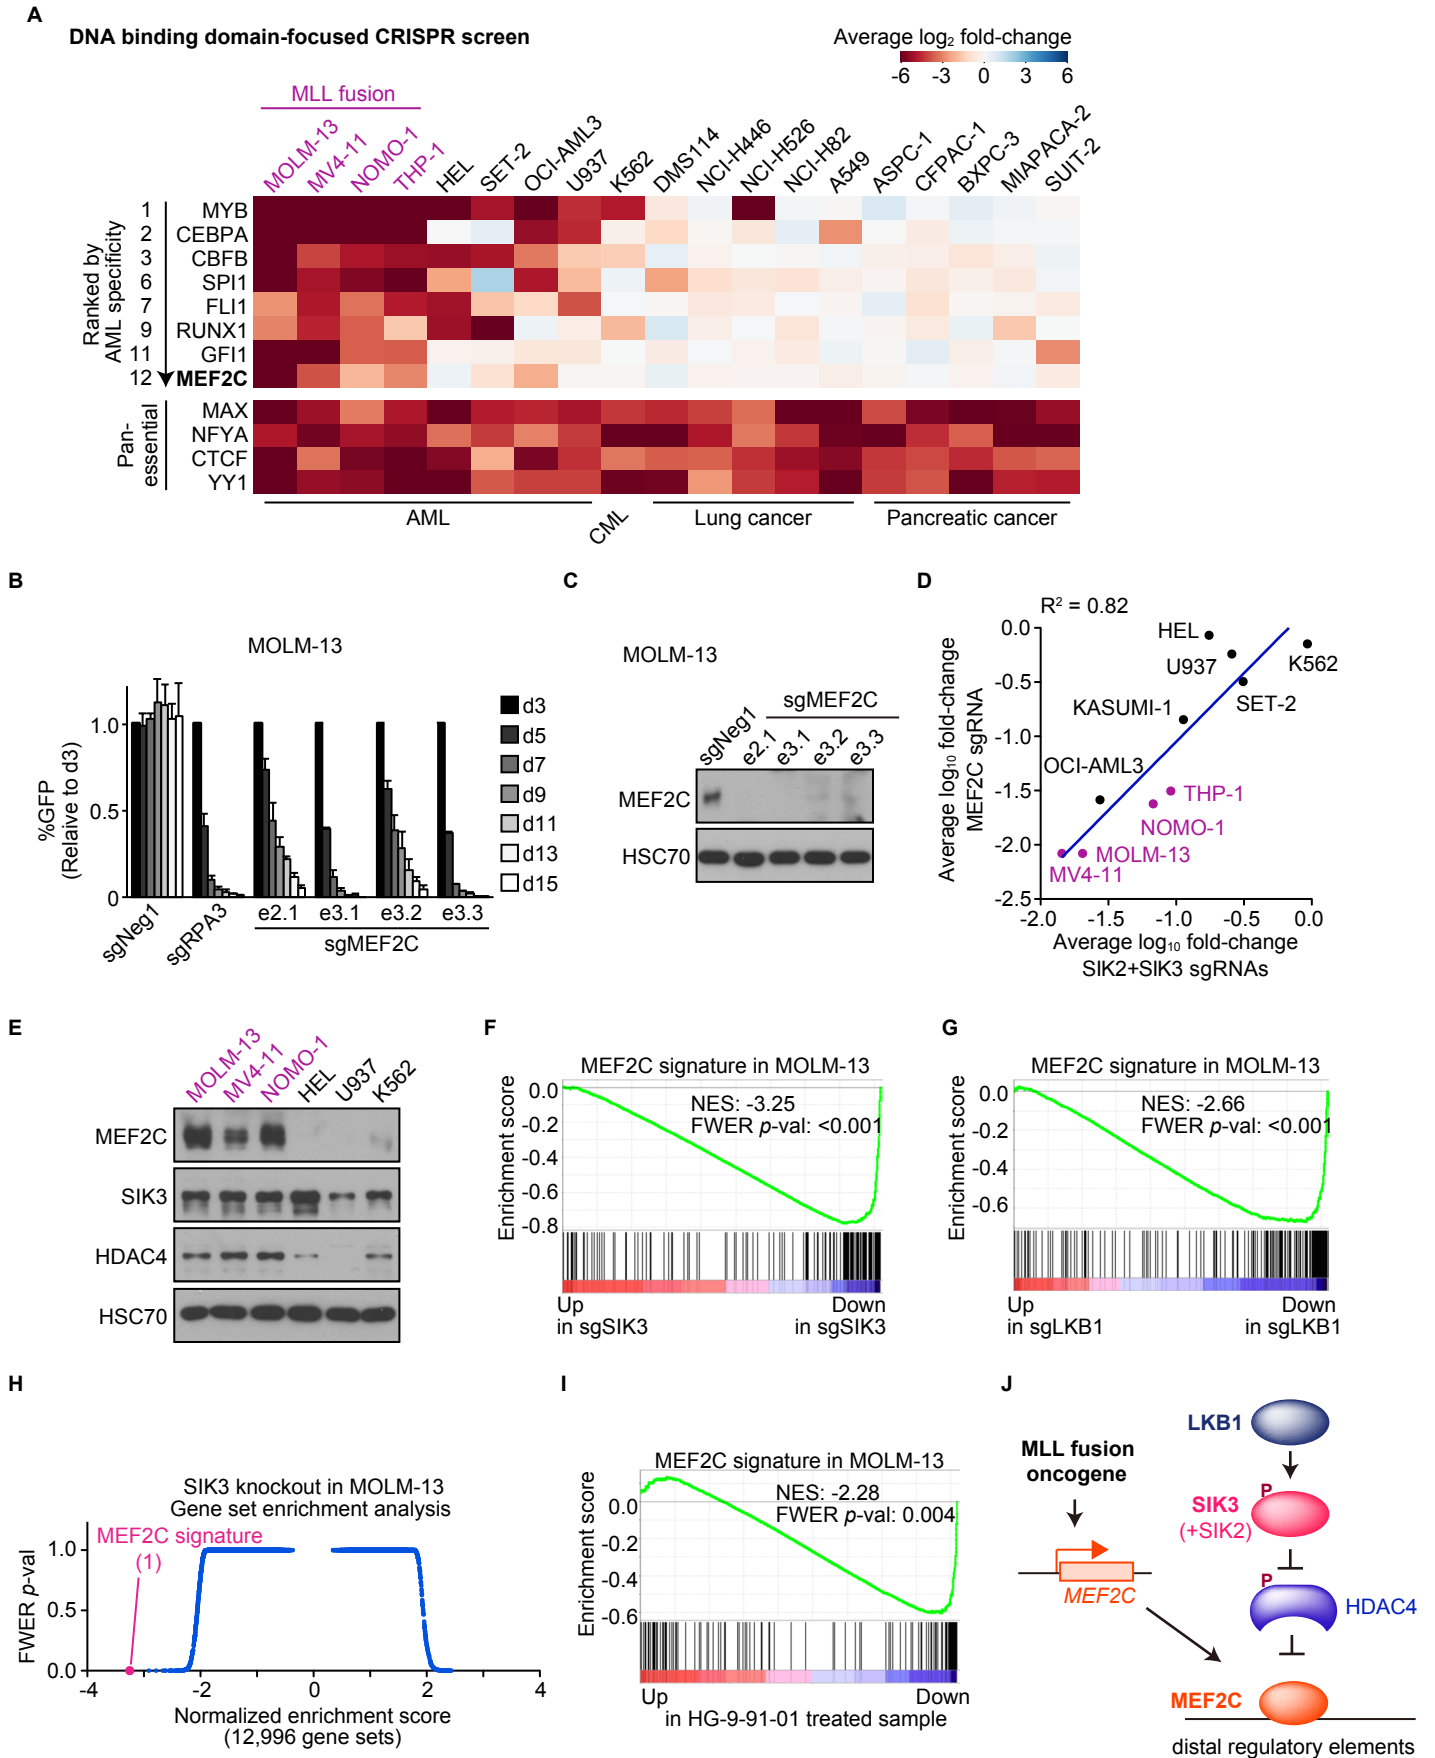

Supplement: NIHMS941608-supplement-4.pdf [file NIHMS941608-supplement-4.pdf]
